# Supplementary material for: Smoked Cannabis' Psychomotor and Neurocognitive Effects in Occasional and Frequent Smokers
Source: Oxford University Press journal article supplement (doi:10.1093/jat/bkv012), 2015-03-04
Supplement: bkv012_Supplementary_Data.zip [file bkv012_Supplementary_Data.zip]

Archive with 6 entries (6 files):
- bkv012supp_Data2.pdf
- bkv012supp_Data3.pdf
- bkv012supp_Data5.pdf
- bkv012supp_Data4.pdf
- bkv012supp_Data6.pdf
- bkv012supp_Data1.pdf
