# Supplementary material for: Smoked Cannabis' Psychomotor and Neurocognitive Effects in Occasional and Frequent Smokers
Source: Oxford University Press journal article supplement (doi:10.1093/jat/bkv012), 2015-03-04
Supplement: bkv012_Supplementary_Data.zip [file bkv012_Supplementary_Data.zip › bkv012supp_Data2.pdf]

**Supplemental Material 2.** Comparison of baseline psychomotor function in 14 frequent and 11 occasional cannabis smokers after at least 19h cannabis abstinence

|                                                         | t             | 95% Confidence Interval | p           |
|---------------------------------------------------------|---------------|-------------------------|-------------|
| <b><i>Psychomotor Control and Divided Attention</i></b> |               |                         |             |
| Lambda-c                                                | -0.775        | -0.681 – 0.310          | 0.446       |
| False Alarms                                            | 0.945         | -1.73 – 4.58            | 0.356       |
| Reaction Time                                           | -0.270        | -298 – 230              | 0.790       |
| Hits                                                    | -0.070        | -4.39 – 4.10            | 0.945       |
| Control Losses                                          | 0.935         | -22.4 – 58.8            | 0.361       |
| Tracking Error                                          | <b>-2.835</b> | <b>-8.39 – -1.28</b>    | <b>0.01</b> |
| <b><i>n-back</i></b>                                    |               |                         |             |
| 1-back Accuracy                                         | -0.437        | -11.2 – 7.27            | 0.666       |
| 2-back Accuracy                                         | 0.308         | -15.3 – 20.6            | 0.761       |
| 3-back Accuracy                                         | -1.07         | -25.9 – 8.29            | 0.297       |
| 1-back Reaction Time                                    | -0.257        | -89.5 – 69.7            | 0.800       |
| 2-back Reaction Time                                    | -1.13         | -169 – 49.5             | 0.269       |
| 3-back Reaction Time                                    | 0.215         | -118 – 145              | 0.832       |
| 1-back Errors of Commission                             | 1.19          | -0.422 – 1.56           | 0.245       |
| 2-back Errors of Commission                             | 0.654         | -2.14 – 4.11            | 0.520       |
| 3-back Errors of Commission                             | 0.108         | -2.85 – 3.16            | 0.915       |
| <b><i>BART</i></b>                                      |               |                         |             |
| Adjusted pump number                                    | 0.072         | -8.92 – 9.57            | 0.943       |
