# Supplementary material for: Smoked Cannabis' Psychomotor and Neurocognitive Effects in Occasional and Frequent Smokers
Source: Oxford University Press journal article supplement (doi:10.1093/jat/bkv012), 2015-03-04
Supplement: bkv012_Supplementary_Data.zip [file bkv012_Supplementary_Data.zip › bkv012supp_Data3.pdf]

**Supplementary Material 3.** Overall session, group, and session by group interaction effects comparing 14 frequent and 11 occasional cannabis smokers following controlled smoking of a 6.8% THC cannabis cigarette.

|                                                  | Session                                              | Group                                          | Session × Group Interaction                         |
|--------------------------------------------------|------------------------------------------------------|------------------------------------------------|-----------------------------------------------------|
| <b>Psychomotor Control and Divided Attention</b> |                                                      |                                                |                                                     |
| Lambda-c                                         | $F_{(4,80)}=0.739, p=0.568$                          | $F_{(1,20)}=0.183, p=0.674$                    | $F_{(4,80)}=0.962, p=0.433$                         |
| False Alarms                                     | <b><math>F_{(4,92)}=2.67, p&lt;0.05</math></b>       | $F_{(1,23)}=4.01, p=0.057$                     | <b><math>F_{(4,92)}=2.554, p&lt;0.05</math></b>     |
| Reaction Time                                    | <b><math>F_{(3.3,75.7)}=2.65, p&lt;0.05</math></b>   | $F_{(1,23)}=2.07, p=0.164$                     | <b><math>F_{(3.3,75.7)}=3.047, p&lt;0.05</math></b> |
| Hits                                             | $F_{(2.4,57.3)}=2.48, p=0.081$                       | <b><math>F_{(1,23)}=5.67, p&lt;0.05</math></b> | $F_{(2.5,57.3)}=1.96, p=0.140$                      |
| Control Losses                                   | $F_{(1.6,36.6)}=0.187, p=0.175$                      | $F_{(1,23)}=1.54, p=0.227$                     | $F_{(1.6,36.6)}=0.729, p=0.460$                     |
| Tracking Error                                   | $F_{(4,92)}=0.922, p=0.455$                          | $F_{(1,23)}=4.03, p=0.056$                     | $F_{(4,92)}=0.950, p=0.439$                         |
| <b>n-back</b>                                    |                                                      |                                                |                                                     |
| 1-back Accuracy                                  | $F_{(3.5,76.1)}=1.19, p=0.321$                       | $F_{(1,22)}=0.030, p=0.864$                    | $F_{(3.5,76.2)}=0.677, p=0.589$                     |
| 2-back Accuracy                                  | <b><math>F_{(3.5,76.5)}=3.06, p&lt;0.05</math></b>   | $F_{(1,22)}=0.033, p=0.858$                    | $F_{(3.5,76.5)}=1.49, p=0.219$                      |
| 3-back Accuracy                                  | $F_{(4,88)}=0.822, p=0.514$                          | $F_{(1,22)}=2.53, p=0.126$                     | $F_{(4,88)}=0.132, p=0.970$                         |
| 1-back Reaction Time                             | <b><math>F_{(4,88)}=3.34, p&lt;0.05</math></b>       | $F_{(1,22)}=0.630, p=0.436$                    | $F_{(4,88)}=0.730, p=0.574$                         |
| 2-back Reaction Time                             | <b><math>F_{(4,88)}=2.61, p&lt;0.05</math></b>       | $F_{(1,22)}=0.286, p=0.598$                    | $F_{(4,88)}=2.23, p=0.072$                          |
| 3-back Reaction Time                             | $F_{(4,88)}=0.702, p=0.593$                          | $F_{(1,22)}=0.231, p=0.635$                    | $F_{(4,88)}=1.27, p=0.290$                          |
| 1-back Errors of Commission                      | $F_{(4,88)}=0.685, p=0.604$                          | $F_{(1,22)}=0.548, p=0.467$                    | $F_{(4,88)}=0.651, p=0.628$                         |
| 2-back Errors of Commission                      | $F_{(2.3,49.9)}=0.580, p=0.585$                      | $F_{(1,22)}=0.369, p=0.550$                    | $F_{(2.3,49.9)}=0.614, p=0.565$                     |
| 3-back Errors of Commission                      | $F_{(3.4,75.1)}=1.06, p=0.378$                       | $F_{(1,22)}=0.123, p=0.729$                    | $F_{(3.4,75.1)}=0.264, p=0.874$                     |
| <b>BART</b>                                      |                                                      |                                                |                                                     |
| Adjusted pump number                             | <b><math>F_{(4,88)}=3.72, p&lt;0.01</math></b>       | $F_{(1,22)}=0.001, p=0.976$                    | $F_{(4,88)}=0.614, p=0.653$                         |
| <b>VAS</b>                                       |                                                      |                                                |                                                     |
| Good Drug Effect                                 | <b><math>F_{(4,93)}=40.8, p&lt;0.001</math></b>      | $F_{(1,23)}=2.35, p=0.139$                     | $F_{(4.2,93.0)}=1.16, p=0.332$                      |
| Sedated                                          | <b><math>F_{(2.3,52.0)}=12.0, p&lt;0.001</math></b>  | $F_{(1,23)}=1.63, p=0.214$                     | $F_{(2.3,51.9)}=0.720, p=0.508$                     |
| Stoned                                           | <b><math>F_{(2.3,51.9)}=26.4, p&lt;0.001</math></b>  | $F_{(1,23)}=2.81, p=0.108$                     | $F_{(2.3,51.9)}=1.27, p=0.290$                      |
| Stimulated                                       | <b><math>F_{(2.6,59.8)}=32.2, p&lt;0.001</math></b>  | <b><math>F_{(1,23)}=4.81, p&lt;0.05</math></b> | $F_{(2.6,59.8)}=0.991, p=0.394$                     |
| High                                             | <b><math>F_{(3.1,71.4)}=50.6, p&lt;0.001</math></b>  | <b><math>F_{(1,23)}=6.19, p&lt;0.05</math></b> | $F_{(3.1,71.4)}=1.50, p=0.220$                      |
| Anxious                                          | <b><math>F_{(2.8,64.2)}=7.11, p&lt;0.001</math></b>  | $F_{(1,23)}=0.682, p=0.417$                    | <b><math>F_{(2.8,64.2)}=3.46, p&lt;0.05</math></b>  |
| Restless                                         | $F_{(4.3,98.2)}=1.62, p=0.171$                       | $F_{(1,23)}=0.528, p=0.475$                    | $F_{(4.3,98.2)}=0.855, p=0.500$                     |
| <b>Physiological Measures</b>                    |                                                      |                                                |                                                     |
| Heart Rate                                       | <b><math>F_{(4.4,100.3)}=17.9, p&lt;0.001</math></b> | <b><math>F_{(1,23)}=13.8, p&lt;0.01</math></b> | <b><math>F_{(4.4,100.3)}=3.66, p&lt;0.01</math></b> |
| Systolic Blood Pressure                          | <b><math>F_{(4.9,113.2)}=4.00, p&lt;0.01</math></b>  | <b><math>F_{(1,23)}=4.29, p&lt;0.05</math></b> | <b><math>F_{(4.9,113.2)}=2.67, p&lt;0.05</math></b> |
| Diastolic Blood Pressure                         | <b><math>F_{(9,207)}=10.3, p&lt;0.001</math></b>     | $F_{(1,23)}=2.33, p=0.141$                     | <b><math>F_{(9,207)}=2.31, p&lt;0.05</math></b>     |
| Respiration                                      | $F_{(9,207)}=0.746, p=0.666$                         | $F_{(1,23)}=1.75, p=0.199$                     | $F_{(9,207)}=0.774, p=0.641$                        |
