# Supplementary material for: Smoked Cannabis' Psychomotor and Neurocognitive Effects in Occasional and Frequent Smokers
Source: Oxford University Press journal article supplement (doi:10.1093/jat/bkv012), 2015-03-04
Supplement: bkv012_Supplementary_Data.zip [file bkv012_Supplementary_Data.zip › bkv012supp_Data4.pdf]

**Supplemental Material 4.** Contrast Comparison for psychomotor, working memory, risk-taking, subjective, and physiological measures following controlled smoking of a 6.8% THC cannabis cigarette in 14 frequent and 11 occasional cannabis smokers

Effect of session on psychomotor tests

|        | Critical Tracking            | Divided Attention            |                              |                                                                   |                                                                   |                                                                   |
|--------|------------------------------|------------------------------|------------------------------|-------------------------------------------------------------------|-------------------------------------------------------------------|-------------------------------------------------------------------|
| Time   | $\lambda$ -c                 | Control Losses               | Tracking Error               | Hits                                                              | False Alarms                                                      | Reaction Time                                                     |
| 1.5 h  | $F(1,20)=0.001$<br>$p=0.974$ | $F(1,23)=0.513$<br>$p=0.481$ | $F(1,23)=0.075$<br>$p=0.787$ | $F(1,23)=0.886$<br>$p=0.356$                                      | $F(1,23)=1.50$<br>$p=0.234$                                       | $F(1,23)=3.65$<br>$p=0.069$                                       |
| 3.5 h  | $F(1,20)=1.14$<br>$p=0.298$  | $F(1,23)=0.625$<br>$p=0.437$ | $F(1,23)=1.35$<br>$p=0.257$  | <b><math>F(1,23)=4.78</math></b><br><b><math>p&lt;0.05</math></b> | $F(1,23)=0.170$<br>$p=0.684$                                      | <b><math>F(1,23)=7.18</math></b><br><b><math>p&lt;0.05</math></b> |
| 5.5 h  | $F(1,20)=1.09$<br>$p=0.310$  | $F(1,23)=2.37$<br>$p=0.137$  | $F(1,23)=0.227$<br>$p=0.638$ | $F(1,23)=0.008$<br>$p=0.931$                                      | $F(1,23)=1.04$<br>$p=0.318$                                       | $F(1,23)=3.45$<br>$p=0.076$                                       |
| 22.5 h | $F(1,20)=1.21$<br>$p=0.284$  | $F(1,23)=3.45$<br>$p=0.076$  | $F(1,23)=0.075$<br>$p=0.786$ | $F(1,23)=0.305$<br>$p=0.586$                                      | <b><math>F(1,23)=5.91</math></b><br><b><math>p&lt;0.05</math></b> | $F(1,23)=0.003$<br>$p=0.958$                                      |

Effect of session by group interaction on psychomotor tests

|        | Critical Tracking                                                 | Divided Attention            |                                                                   |                                                                   |                                                                   |                                                                   |
|--------|-------------------------------------------------------------------|------------------------------|-------------------------------------------------------------------|-------------------------------------------------------------------|-------------------------------------------------------------------|-------------------------------------------------------------------|
| Time   | $\lambda$ -c                                                      | Control Losses               | Tracking Error                                                    | Hits                                                              | False Alarms                                                      | Reaction Time                                                     |
| 1.5 h  | <b><math>F(1,20)=5.22</math></b><br><b><math>p&lt;0.05</math></b> | $F(1,23)=0.002$<br>$p=0.965$ | <b><math>F(1,23)=5.81</math></b><br><b><math>p&lt;0.05</math></b> | $F(1,23)=4.02$<br>$p=0.057$                                       | <b><math>F(1,23)=4.67</math></b><br><b><math>p&lt;0.05</math></b> | <b><math>F(1,23)=8.29</math></b><br><b><math>p&lt;0.01</math></b> |
| 3.5 h  | $F(1,20)=2.33$<br>$p=0.143$                                       | $F(1,23)=0.056$<br>$p=0.815$ | $F(1,23)=0.073$<br>$p=0.789$                                      | <b><math>F(1,23)=5.41</math></b><br><b><math>p&lt;0.05</math></b> | $F(1,23)=0.321$<br>$p=0.577$                                      | <b><math>F(1,23)=9.05</math></b><br><b><math>p&lt;0.01</math></b> |
| 5.5 h  | $F(1,20)=0.444$<br>$p=0.513$                                      | $F(1,23)=0.499$<br>$p=0.487$ | $F(1,23)=0.537$<br>$p=0.471$                                      | $F(1,23)=3.69$<br>$p=0.067$                                       | $F(1,23)=2.08$<br>$p=0.163$                                       | $F(1,23)=2.45$<br>$p=0.131$                                       |
| 22.5 h | $F(1,20)=3.09$<br>$p=0.094$                                       | $F(1,23)=3.49$<br>$p=0.074$  | $F(1,23)=1.07$<br>$p=0.313$                                       | $F(1,23)=1.36$<br>$p=0.255$                                       | $F(1,23)=1.26$<br>$p=0.274$                                       | $F(1,23)=0.037$<br>$p=0.849$                                      |

Effect of session on n-back

| Time   | Accuracy                     |                              |                              | Reaction Time                                                     |                                                                   |                              | Errors of Commission         |                              |                              |
|--------|------------------------------|------------------------------|------------------------------|-------------------------------------------------------------------|-------------------------------------------------------------------|------------------------------|------------------------------|------------------------------|------------------------------|
|        | 1-back                       | 2-back                       | 3-back                       | 1-back                                                            | 2-back                                                            | 3-back                       | 1-back                       | 2-back                       | 3-back                       |
| 1.5 h  | $F(1,22)=0.007$<br>$p=0.936$ | $F(1,22)=0.801$<br>$p=0.380$ | $F(1,22)=2.35$<br>$p=0.140$  | <b><math>F(1,22)=6.42</math></b><br><b><math>P&lt;0.05</math></b> | $F(1,22)=0.306$<br>$p=0.585$                                      | $F(1,22)=1.28$<br>$p=0.270$  | $F(1,22)=0.393$<br>$p=0.537$ | $F(1,22)=1.56$<br>$p=0.224$  | $F(1,22)=2.40$<br>$p=0.136$  |
| 3.5 h  | $F(1,22)=1.52$<br>$p=0.230$  | $F(1,22)=3.50$<br>$p=0.075$  | $F(1,22)=2.42$<br>$p=0.134$  | $F(1,22)=3.20$<br>$p=0.087$                                       | $F(1,22)=0.209$<br>$p=0.652$                                      | $F(1,22)=0.147$<br>$p=0.705$ | $F(1,22)=1.69$<br>$p=0.208$  | $F(1,22)=0.334$<br>$p=0.569$ | $F(1,22)=1.81$<br>$p=0.192$  |
| 5.5 h  | $F(1,22)=1.04$<br>$p=0.319$  | $F(1,22)=0.038$<br>$p=0.847$ | $F(1,22)=0.241$<br>$p=0.629$ | $F(1,22)=0.064$<br>$p=0.803$                                      | $F(1,22)=2.08$<br>$p=0.163$                                       | $F(1,22)=0.535$<br>$p=0.472$ | $F(1,22)=0.083$<br>$p=0.776$ | $F(1,22)=0.011$<br>$p=0.919$ | $F(1,22)=1.32$<br>$p=0.264$  |
| 22.5 h | $F(1,22)=0.001$<br>$p=0.974$ | $F(1,22)=0.409$<br>$p=0.529$ | $F(1,22)=0.686$<br>$p=0.417$ | $F(1,22)=0.673$<br>$p=0.421$                                      | <b><math>F(1,22)=4.86</math></b><br><b><math>P&lt;0.05</math></b> | $F(1,22)=0.051$<br>$p=0.824$ | $F(1,22)=0$<br>$p=0.990$     | $F(1,22)=0.449$<br>$p=0.510$ | $F(1,22)=0.124$<br>$p=0.729$ |

Effect of session by group interaction on n-back

| Time   | Accuracy                     |                              |                              | Reaction Time                |                                                                   |                              | Errors of Commission         |                              |                              |
|--------|------------------------------|------------------------------|------------------------------|------------------------------|-------------------------------------------------------------------|------------------------------|------------------------------|------------------------------|------------------------------|
|        | 1-back                       | 2-back                       | 3-back                       | 1-back                       | 2-back                                                            | 3-back                       | 1-back                       | 2-back                       | 3-back                       |
| 1.5 h  | $F(1,22)=0.934$<br>$p=0.344$ | $F(1,22)=0.397$<br>$p=0.535$ | $F(1,22)=0.105$<br>$p=0.749$ | $F(1,22)=2.24$<br>$p=0.148$  | $F(1,22)=0.865$<br>$p=0.362$                                      | $F(1,22)=1.89$<br>$p=0.183$  | $F(1,22)=0.006$<br>$p=0.939$ | $F(1,22)=0.652$<br>$p=0.428$ | $F(1,22)=0.473$<br>$p=0.499$ |
| 3.5 h  | $F(1,22)=0.023$<br>$p=0.880$ | $F(1,22)=1.48$<br>$p=0.237$  | $F(1,22)=0.175$<br>$p=0.680$ | $F(1,22)=0.343$<br>$p=0.564$ | $F(1,22)=3.26$<br>$p=0.085$                                       | $F(1,22)=0.114$<br>$p=0.739$ | $F(1,22)=0.270$<br>$p=0.609$ | $F(1,22)=0.445$<br>$p=0.512$ | $F(1,22)=0.364$<br>$p=0.552$ |
| 5.5 h  | $F(1,22)=1.45$<br>$p=0.241$  | $F(1,22)=0.415$<br>$p=0.526$ | $F(1,22)=0$<br>$p=0.991$     | $F(1,22)=0.636$<br>$p=0.434$ | $F(1,22)=0$<br>$p=0.991$                                          | $F(1,22)=1.46$<br>$p=0.240$  | $F(1,22)=2.67$<br>$p=0.117$  | $F(1,22)=0.047$<br>$p=0.830$ | $F(1,22)=1.02$<br>$p=0.325$  |
| 22.5 h | $F(1,22)=0.020$<br>$p=0.889$ | $F(1,22)=0.923$<br>$p=0.347$ | $F(1,22)=0.013$<br>$p=0.910$ | $F(1,22)=0.031$<br>$p=0.862$ | <b><math>F(1,22)=4.49</math></b><br><b><math>P&lt;0.05</math></b> | $F(1,22)=0.063$<br>$p=0.803$ | $F(1,22)=0.886$<br>$p=0.357$ | $F(1,22)=0.449$<br>$p=0.510$ | $F(1,22)=0.061$<br>$p=0.807$ |

Effect of session on BART

| Time   | Adjusted Pumps               |
|--------|------------------------------|
| 1.9 h  | $F(1,22)=0.114$<br>$p=0.739$ |
| 3.9 h  | $F(1,22)=0.574$<br>$p=0.457$ |
| 5.9 h  | $F(1,22)=1.31$<br>$p=0.265$  |
| 22.9 h | $F(1,22)=4.03$<br>$p=0.057$  |

Effect of session by group interaction on BART

| Time   | Adjusted Pumps               |
|--------|------------------------------|
| 1.9 h  | $F(1,22)=0.057$<br>$p=0.814$ |
| 3.9 h  | $F(1,22)=0.750$<br>$p=0.396$ |
| 5.9 h  | $F(1,22)=0.065$<br>$p=0.802$ |
| 22.9 h | $F(1,22)=0.038$<br>$p=0.847$ |

Effect of session on VAS

| Time   | Good Drug Effect            | Sedated                     | Stoned                      | Stimulated                  | High                        | Anxious                      | Restless                    |
|--------|-----------------------------|-----------------------------|-----------------------------|-----------------------------|-----------------------------|------------------------------|-----------------------------|
| 0.25 h | $F(1,23)=209$<br>$p<0.001$  | $F(1,23)=19.5$<br>$p<0.001$ | $F(1,23)=48.0$<br>$p<0.001$ | $F(1,23)=74.1$<br>$p<0.001$ | $F(1,23)=192$<br>$p<0.001$  | $F(1,23)=1.57$<br>$p=0.223$  | $F(1,23)=13.5$<br>$p<0.01$  |
| 0.5 h  | $F(1,23)=103$<br>$p<0.001$  | $F(1,23)=17.4$<br>$p<0.001$ | $F(1,23)=38.0$<br>$p<0.001$ | $F(1,23)=50.4$<br>$p<0.001$ | $F(1,23)=99.7$<br>$p<0.001$ | $F(1,23)=0.055$<br>$p=0.816$ | $F(1,23)=4.96$<br>$p<0.05$  |
| 1 h    | $F(1,23)=101$<br>$p<0.001$  | $F(1,23)=15.4$<br>$p<0.001$ | $F(1,23)=30.3$<br>$p<0.001$ | $F(1,23)=38.1$<br>$p<0.001$ | $F(1,23)=82.5$<br>$p<0.001$ | $F(1,23)=0.574$<br>$p=0.456$ | $F(1,23)=2.13$<br>$p=0.158$ |
| 2 h    | $F(1,23)=60.4$<br>$p<0.001$ | $F(1,23)=14.8$<br>$p<0.001$ | $F(1,23)=30.4$<br>$p<0.001$ | $F(1,23)=29.1$<br>$p<0.001$ | $F(1,23)=37.7$<br>$p<0.001$ | $F(1,23)=1.60$<br>$p=0.219$  | $F(1,23)=2.40$<br>$p=0.135$ |
| 3 h    | $F(1,23)=26.1$<br>$p<0.001$ | $F(1,23)=8.90$<br>$p<0.01$  | $F(1,23)=18.4$<br>$p<0.001$ | $F(1,23)=14.3$<br>$p<0.001$ | $F(1,23)=28.8$<br>$p<0.001$ | $F(1,23)=3.73$<br>$p=0.066$  | $F(1,23)=3.52$<br>$p=0.073$ |
| 4 h    | $F(1,23)=14.1$<br>$p<0.01$  | $F(1,23)=7.70$<br>$p<0.05$  | $F(1,23)=8.42$<br>$p<0.01$  | $F(1,23)=10.8$<br>$p<0.01$  | $F(1,23)=15.7$<br>$p<0.001$ | $F(1,23)=2.65$<br>$p=0.117$  | $F(1,23)=4.60$<br>$p<0.05$  |
| 5 h    | $F(1,23)=9.09$<br>$p<0.01$  | $F(1,23)=6.09$<br>$p<0.05$  | $F(1,23)=5.81$<br>$p<0.05$  | $F(1,23)=7.78$<br>$p<0.05$  | $F(1,23)=7.97$<br>$p<0.01$  | $F(1,23)=3.50$<br>$p=0.074$  | $F(1,23)=4.10$<br>$p=0.055$ |
| 6 h    | $F(1,23)=4.59$<br>$p<0.05$  | $F(1,23)=5.13$<br>$p<0.05$  | $F(1,23)=6.00$<br>$p<0.05$  | $F(1,23)=8.02$<br>$p<0.01$  | $F(1,23)=7.45$<br>$p<0.05$  | $F(1,23)=4.60$<br>$p<0.05$   | $F(1,23)=4.24$<br>$p=0.051$ |

Effect of session by group interaction on VAS

| Time   | Good Drug Effect             | Sedated                      | Stoned                       | Stimulated                   | High                         | Anxious                      | Restless                     |
|--------|------------------------------|------------------------------|------------------------------|------------------------------|------------------------------|------------------------------|------------------------------|
| 0.25 h | $F(1,23)=0.172$<br>$p=0.682$ | $F(1,23)=0.282$<br>$p=0.600$ | $F(1,23)=0.122$<br>$p=0.730$ | $F(1,23)=0.115$<br>$p=0.738$ | $F(1,23)=0.027$<br>$p=0.870$ | $F(1,23)=2.65$<br>$p=0.117$  | $F(1,23)=4.17$<br>$p=0.053$  |
| 0.5 h  | $F(1,23)=0.013$<br>$p=0.910$ | $F(1,23)=0$<br>$p=0.990$     | $F(1,23)=0.063$<br>$p=0.804$ | $F(1,23)=0.540$<br>$p=0.470$ | $F(1,23)=0.134$<br>$p=0.718$ | $F(1,23)=5.65$<br>$p<0.05$   | $F(1,23)=0.008$<br>$p=0.928$ |
| 1 h    | $F(1,23)=0.075$<br>$p=0.787$ | $F(1,23)=0.110$<br>$p=0.743$ | $F(1,23)=0.463$<br>$p=0.503$ | $F(1,23)=0.574$<br>$p=0.456$ | $F(1,23)=0.126$<br>$p=0.726$ | $F(1,23)=5.89$<br>$p<0.05$   | $F(1,23)=0.039$<br>$p=0.845$ |
| 2 h    | $F(1,23)=5.10$<br>$p<0.05$   | $F(1,23)=5.19$<br>$p<0.05$   | $F(1,23)=8.69$<br>$p<0.01$   | $F(1,23)=6.27$<br>$p<0.05$   | $F(1,23)=5.28$<br>$p<0.05$   | $F(1,23)=7.35$<br>$p<0.05$   | $F(1,23)=0.001$<br>$p=0.973$ |
| 3 h    | $F(1,23)=1.58$<br>$p=0.222$  | $F(1,23)=3.23$<br>$p=0.085$  | $F(1,23)=8.63$<br>$p<0.01$   | $F(1,23)=8.18$<br>$p<0.01$   | $F(1,23)=11.4$<br>$p<0.01$   | $F(1,23)=4.76$<br>$p<0.05$   | $F(1,23)=0.113$<br>$p=0.740$ |
| 4 h    | $F(1,23)=2.04$<br>$p=0.167$  | $F(1,23)=5.51$<br>$p<0.05$   | $F(1,23)=5.97$<br>$p<0.05$   | $F(1,23)=9.60$<br>$p<0.01$   | $F(1,23)=10.6$<br>$p<0.01$   | $F(1,23)=5.44$<br>$p<0.05$   | $F(1,23)=0.053$<br>$p=0.821$ |
| 5 h    | $F(1,23)=1.61$<br>$p=0.217$  | $F(1,23)=4.69$<br>$p<0.05$   | $F(1,23)=5.09$<br>$p<0.05$   | $F(1,23)=6.42$<br>$p<0.05$   | $F(1,23)=7.50$<br>$p<0.05$   | $F(1,23)=5.05$<br>$p<0.05$   | $F(1,23)=0.017$<br>$p=0.899$ |
| 6 h    | $F(1,23)=2.37$<br>$p=0.137$  | $F(1,23)=3.68$<br>$p=0.068$  | $F(1,23)=4.69$<br>$p<0.05$   | $F(1,23)=6.79$<br>$p<0.05$   | $F(1,23)=6.02$<br>$p<0.05$   | $F(1,23)=3.978$<br>$p=0.058$ | $F(1,23)=0.002$<br>$p=0.964$ |

# Effect of session on Physiological measures

| Time  | Heart Rate                  | Systolic Blood Pressure      | Diastolic Blood Pressure     | Respirations per Minute      |
|-------|-----------------------------|------------------------------|------------------------------|------------------------------|
| 0.5 h | $F(1,23)=47.8$<br>$p<0.001$ | $F(1,23)=3.40$<br>$p=0.078$  | $F(1,23)=0.587$<br>$p=0.451$ | $F(1,23)=2.51$<br>$p=0.127$  |
| 1 h   | $F(1,23)=35.6$<br>$p<0.001$ | $F(1,23)=0.357$<br>$p=0.556$ | $F(1,23)=1.20$<br>$p=0.285$  | $F(1,23)=0.263$<br>$p=0.613$ |
| 1.5 h | $F(1,23)=17.4$<br>$p<0.001$ | $F(1,23)=2.44$<br>$p=0.132$  | $F(1,23)=2.64$<br>$p=0.118$  | $F(1,23)=1.94$<br>$p=0.177$  |
| 2 h   | $F(1,23)=7.45$<br>$p<0.05$  | $F(1,23)=4.89$<br>$p<0.05$   | $F(1,23)=7.60$<br>$p<0.05$   | $F(1,23)=0.122$<br>$p=0.730$ |
| 2.5 h | $F(1,23)=2.92$<br>$p=0.101$ | $F(1,23)=8.99$<br>$p<0.01$   | $F(1,23)=7.69$<br>$p<0.05$   | $F(1,23)=0.081$<br>$p=0.779$ |
| 3 h   | $F(1,23)=11.5$<br>$p<0.01$  | $F(1,23)=0.014$<br>$p=0.908$ | $F(1,23)=11.9$<br>$p<0.01$   | $F(1,23)=0.042$<br>$p=0.840$ |
| 4 h   | $F(1,23)=6.20$<br>$p<0.05$  | $F(1,23)=10.7$<br>$p<0.01$   | $F(1,23)=54.8$<br>$p<0.001$  | $F(1,23)=0.283$<br>$p=0.600$ |
| 5 h   | $F(1,23)=14.5$<br>$p<0.001$ | $F(1,23)=10.3$<br>$p<0.01$   | $F(1,23)=31.5$<br>$p<0.001$  | $F(1,23)=0.008$<br>$p=0.930$ |
| 6 h   | $F(1,23)=2.75$<br>$p=0.111$ | $F(1,23)=4.13$<br>$p=0.054$  | $F(1,23)=17.3$<br>$p<0.001$  | $F(1,23)=0.002$<br>$p=0.961$ |

# Effect of session by group interaction on physiological measures

| Time  | Heart Rate                   | Systolic Blood Pressure      | Diastolic Blood Pressure     | Respirations per Minute      |
|-------|------------------------------|------------------------------|------------------------------|------------------------------|
| 0.5 h | $F(1,23)=4.21$<br>$p=0.052$  | $F(1,23)=12.2$<br>$p<0.01$   | $F(1,23)=7.20$<br>$p<0.05$   | $F(1,23)=0.217$<br>$p=0.646$ |
| 1 h   | $F(1,23)=10.0$<br>$p<0.01$   | $F(1,23)=8.20$<br>$p<0.01$   | $F(1,23)=7.18$<br>$p<0.05$   | $F(1,23)=0.050$<br>$p=0.825$ |
| 1.5 h | $F(1,23)=6.04$<br>$p<0.05$   | $F(1,23)=3.98$<br>$p=0.058$  | $F(1,23)=8.62$<br>$p<0.01$   | $F(1,23)=0.048$<br>$p=0.828$ |
| 2 h   | $F(1,23)=7.45$<br>$p<0.05$   | $F(1,23)=2.47$<br>$p=0.130$  | $F(1,23)=2.88$<br>$p=0.103$  | $F(1,23)=0.832$<br>$p=0.371$ |
| 2.5 h | $F(1,23)=5.51$<br>$p<0.05$   | $F(1,23)=2.43$<br>$p=0.133$  | $F(1,23)=8.69$<br>$p<0.01$   | $F(1,23)=1.33$<br>$p=0.261$  |
| 3 h   | $F(1,23)=7.57$<br>$p<0.05$   | $F(1,23)=0.007$<br>$p=0.933$ | $F(1,23)=1.33$<br>$p=0.260$  | $F(1,23)=0.008$<br>$p=0.928$ |
| 4 h   | $F(1,23)=0.398$<br>$p=0.534$ | $F(1,23)=0.001$<br>$p=0.973$ | $F(1,23)=1.44$<br>$p=0.243$  | $F(1,23)=0.283$<br>$p=0.600$ |
| 5 h   | $F(1,23)=0.940$<br>$p=0.342$ | $F(1,23)=0.001$<br>$p=0.973$ | $F(1,23)=1.22$<br>$p=0.281$  | $F(1,23)=0.039$<br>$p=0.844$ |
| 6 h   | $F(1,23)=0.026$<br>$p=0.874$ | $F(1,23)=0.013$<br>$p=0.910$ | $F(1,23)=0.100$<br>$p=0.754$ | $F(1,23)=0.251$<br>$p=0.621$ |
