# Supplementary material for: Smoked Cannabis' Psychomotor and Neurocognitive Effects in Occasional and Frequent Smokers
Source: Oxford University Press journal article supplement (doi:10.1093/jat/bkv012), 2015-03-04
Supplement: bkv012_Supplementary_Data.zip [file bkv012_Supplementary_Data.zip › bkv012supp_Data5.pdf]

**Supplemental Material 5.** Correlation between baseline Balloon Analog Risk-Taking Task (BART) and self-reported risk-taking and impulsivity behavior in 14 frequent and 11 occasional cannabis smokers after at least 19h cannabis abstinence

|                                                                         | Occasional Smokers  |                 | Frequent Smokers    |                |
|-------------------------------------------------------------------------|---------------------|-----------------|---------------------|----------------|
|                                                                         | Pearson Correlation | <i>p</i> value  | Pearson Correlation | <i>p</i> value |
| <b><i>Melbourne Decision Making Scales</i></b>                          |                     |                 |                     |                |
| Vigilance                                                               | -0.085              | 0.815           | 0.493               | 0.073          |
| Buck Passing                                                            | 0.041               | 0.910           | 0.182               | 0.533          |
| Procrastination                                                         | -0.202              | 0.576           | -0.130              | 0.657          |
| Hypervigilence                                                          | -0.389              | 0.266           | -0.082              | 0.782          |
| <b><i>Self-Assessments of Risk Perception and Sensation Seeking</i></b> |                     |                 |                     |                |
| Risk Perception                                                         | <b>0.718</b>        | <b>&lt;0.05</b> | -0.038              | 0.896          |
| Risk-Taking/Impulsivity                                                 | -0.321              | 0.365           | -0.241              | 0.407          |
| Sensation-Seeking                                                       | -0.152              | 0.676           | 0.285               | 0.323          |
| <b><i>Barratt Impulsiveness Scale Version 11 (BIS-11)</i></b>           |                     |                 |                     |                |
| Attentional Impulse                                                     | 0.565               | 0.089           | -0.186              | 0.525          |
| Total Motor Impulsiveness                                               | 0.052               | 0.887           | 0.137               | 0.640          |
| Total non-Planning Impulsiveness                                        | 0.617               | 0.057           | -0.379              | 0.181          |
| Total                                                                   | <b>0.647</b>        | <b>&lt;0.05</b> | -0.261              | 0.368          |
| <b><i>Zuckerman-Kuhlman Personality Questionnaire (ZKPQ)</i></b>        |                     |                 |                     |                |
| Impulsivity                                                             | 0.270               | 0.450           | -0.334              | 0.243          |
| Sensation-Seeking                                                       | 0.553               | 0.097           | -0.251              | 0.387          |
| Total                                                                   | 0.505               | 0.136           | -0.339              | 0.236          |
| <b><i>Risk Perception Questionnaire</i></b>                             |                     |                 |                     |                |
| Controllable Events                                                     | 0.394               | 0.260           | -0.084              | 0.774          |
| Uncontrollable Events                                                   | 0.429               | 0.216           | 0.108               | 0.713          |
| Neutral Events                                                          | 0.592               | 0.071           | 0.234               | 0.421          |
