# Supplementary material for: Smoked Cannabis' Psychomotor and Neurocognitive Effects in Occasional and Frequent Smokers
Source: Oxford University Press journal article supplement (doi:10.1093/jat/bkv012), 2015-03-04

**Supplemental Material 6.** Median (interquartile range) for subjective effects on the Likert scales for 14 frequent and 11 occasional cannabis smokers following controlled smoking of a 6.8% THC cannabis cigarette.

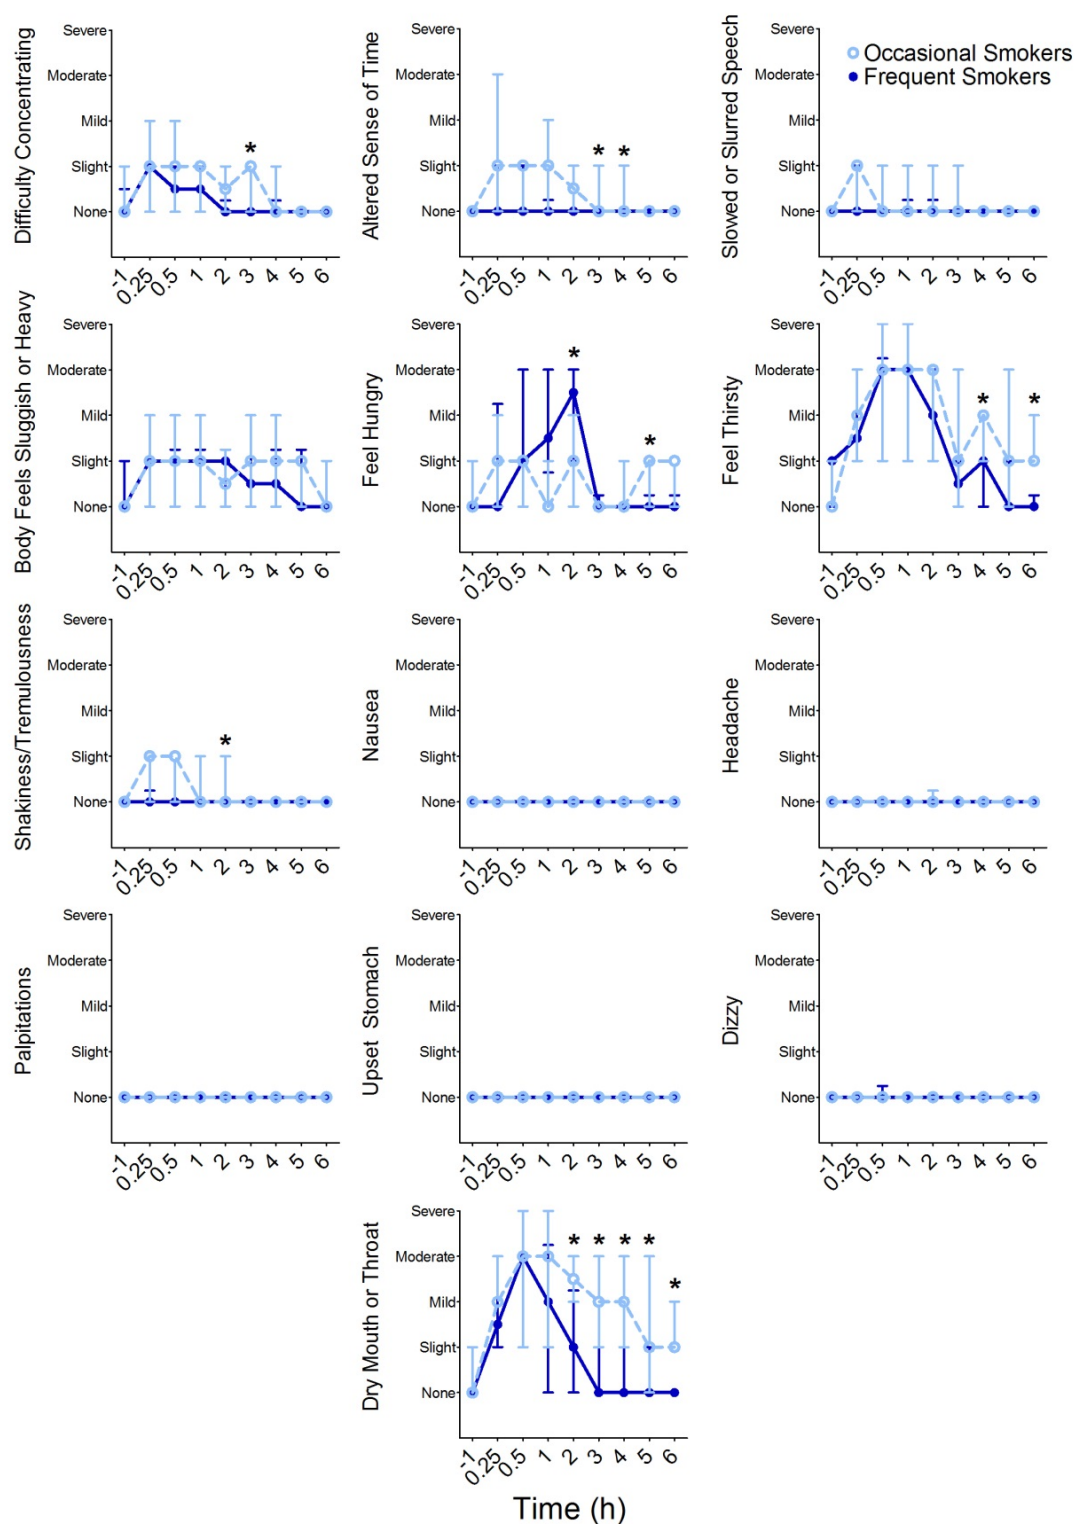

Supplement: bkv012_Supplementary_Data.zip [file bkv012_Supplementary_Data.zip › bkv012supp_Data6.pdf]
